# Supplementary material for: Comparative Spectroscopic and Electrochemical Study of V(V)-Substituted Keggin-Type Phosphomolybdates and -Tungstates
Source: MDPI journal article supplement (doi:10.3390/inorganics11040138), 2023-03-23
Supplement: s1 [file s1]

Archive with 1 entries (1 files):
- inorganics-2273977-supplementary.pdf
